1 Altered structure and stability of bat-prey interaction networks in logged tropical forests  
2 revealed by metabarcoding

3

4 David R. Hemprich-Bennett<sup>1,2</sup>, Victoria A. Kemp<sup>1</sup>, Joshua Blackman<sup>1</sup>, Matthew J. Struebig<sup>3</sup>,  
5 Owen T. Lewis<sup>2</sup>, Stephen J. Rossiter<sup>1</sup>, Elizabeth L. Clare<sup>1</sup>

6

7 Addresses:

8 <sup>1</sup>School of Biological and Chemical Sciences, Queen Mary University of London, Mile End  
9 Road, London, UK E1 4NS

10 <sup>2</sup>Department of Zoology, University of Oxford, 11a Mansfield Road, Oxford, UK, OX1 3SZ

11 <sup>3</sup>Durrell Institute of Conservation and Ecology, University of Kent, Canterbury, Kent, UK,  
12 CT2 7NZ,

13

14 Correspondence: David Hemprich-Bennett: Department of Zoology, University of Oxford, 11a  
15 Mansfield Road, Oxford, UK, OX1 3SZ, [hemprich.bennett@gmail.com](mailto:hemprich.bennett@gmail.com)

16

17 Type of Article: Research article

18 Keywords: Bats, Borneo, Conservation, Ecological interactions, Metabarcoding, Network  
19 ecology, Rainforest degradation, Tropical ecology

20 **Data Accessibility Statement:** Data are currently archived at the Centre for Ecology and  
21 Hydrology Environmental Information Data Centre  
22 (<https://doi.org/10.5285/8b106445-d8e0-482c-b517-5a372a09dc91>) and will be released from  
23 embargo following publication. Specific analysis scripts are available on GitHub with links  
24 given in the manuscript and will be archived on Zenodo prior to publication.  
25  
26 Statement of authorship: SR, EC, DHB, MS and OTL conceived the project, DHB, VK and JB  
27 undertook field collections and laboratory work, DHB analysed the data with input from EC,  
28 and DHB wrote the manuscript with input from all authors.

## 29 **Abstract**

- 30 1. Habitat degradation is pervasive across the tropics and is particularly acute in Southeast  
31 Asia, with major implications for biodiversity. Much research has addressed the impact  
32 of degradation on species diversity; however, little is known about how ecological  
33 interactions are altered, including those that constitute important ecosystem functions  
34 such as pest consumption.
- 35 2. We examined how rainforest degradation alters trophic interaction networks linking  
36 insectivorous bats and their prey. We used DNA metabarcoding to study the diets of  
37 forest-dwelling insectivorous bat species, and compared bat-prey interaction networks  
38 between old growth forest and forest degraded by logging in Sabah, Borneo.
- 39 3. We predicted that rainforest degradation would cause measurable reductions in the  
40 numbers of prey consumed by individual bats, and that this degradation would yield  
41 networks in logged forest with lower functional complementarity, modularity and  
42 nestedness than those in old growth forest.
- 43 4. Compared to bats in old growth rainforest, bats in logged sites consumed a lower  
44 diversity of prey. Their interaction networks were less nested and had a more modular  
45 structure in which bat species had lower closeness centrality scores than in old growth  
46 forest. These network structures were associated with reduced network redundancy and  
47 thus increased vulnerability to perturbations in logged forests.
- 48 5. Our results show how ecological interactions change between old growth and logged  
49 forests, with potentially negative implications for ecosystem function and network  
50 stability. We also highlight the potential importance of insectivorous bats in consuming  
51 invertebrate pests.

## 52 **Malay abstract**

- 53 1. Degradasi habitat merupakan suatu fenomena yang berleluasa dikawasan tropika,  
54 terutamanya di Asia Tenggara dengan implikasi yang besar ke atas biodiversiti. Banyak  
55 kajian telahpun meneliti impak degradasi habitat atas kepelbagaian spesis. Walau  
56 bagaimanapun, dari segi mana interaksi ekologi diubah suai kurang diselidik, termasuk  
57 interaksi yang membentuk fungsi ekosistem yang penting seperti pemakanan binatang  
58 perosak.
- 59 2. Kami telah memeriksa bagaimana degradasi hutan hujan tropika dapat mengubah suai  
60 interaksi antara tahap trofik yang menghubungkan kelawar yang memakan serangga  
61 dan mangsa mereka. Kami telah menggunakan “DNA metabarcoding” untuk mengenal  
62 pasti kandungan artropod dalam sampel najis kelawar and membandingkan jaringan  
63 interaksi kelawar dan mangsa mereka diantara hutan dara dan hutan yang telah dibalak  
64 di Sabah, Borneo.
- 65 3. Kami meramalkan bahawa degradasi hutan hujan akan menyebabkan kekurangan  
66 dalam bilangan nod mangsa yang dimakan oleh setiap individu kelawar yang dapat  
67 diukur. Degradasi ini pula boleh menghasilkan jaringan yang mempunyai fungsi saling  
68 melengkapi dan modulariti yang rendah, dan lebih berkelompok atau “mempunyai  
69 “nestedness” yang lebih tinggi di hutan yang dibalak berbanding hutan dara.
- 70 4. Kelawar di kawasan hutan yang dibalak memakan diversiti mangsa yang lebih rendah  
71 dengan kelawar di habitat hutan hujan dara. Jaringan-jaringan interaksi mereka kurang  
72 berkelompok dan mempunyai stuktur yang lebih modular dimana spesis kelawar  
73 mempunyai pemarkahan kerapatan berpusat yang lebih rendah daripada sepesis  
74 kelawar di hutan dara. Struktur-struktur jaringan ini berkait dengan lebih jaringan  
75 atau “network redundancy” yang lebih rendah and ini membawa kepada kerentanan  
76 yang meningkat terhadap gangguan luar di hutan yang telah dibalak.

77           5. Keputusan kami menunjukkan bagaimana interaksi ekologi berubah diantara hutan dara  
78           dan hutan yang dibalak, dengan potensi implikasi negatif untuk fungsi ekosistem dan  
79           kestabilan jaringan. Kami juga telah menunjukkan potensi kepentingan kelawar yang  
80           memakan serangga dalam fungsi mereka untuk makan perosak invertebrat.

## 81 **Introduction**

82 Many tropical forests have been degraded by human activity, leading to biodiversity loss  
83 (Barlow et al., 2016) and modifying the ecological processes fundamental to forest dynamics  
84 (Ghazoul, Burivalova, Garcia-Ulloa, & King, 2015) such as the regeneration of plant  
85 communities. Land-use change is responsible for 62% of habitat alteration in Asia (Song et al.,  
86 2018), with degraded forests being of particular conservation interest; these habitats may retain  
87 high biodiversity yet have minimal protection and are vulnerable to clearance for agriculture  
88 and development (Meijaard et al., 2018).

89

90 The island of Borneo hosts high biodiversity but has lost much of its old growth forest, with  
91 46% of its remaining forest classified as degraded by selective logging (Gaveau et al., 2014).  
92 As a consequence, there is considerable interest in understanding the conservation value and  
93 viability of these remaining forest areas (Meijaard & Sheil, 2007; Melo, Arroyo-Rodríguez,  
94 Fahrig, Martínez-Ramos, & Tabarelli, 2013), especially given their minimal conservation  
95 protection under current policies (Struebig et al., 2015). Mounting evidence suggests  
96 selectively-logged forests can support a substantial proportion of the original biota, and are  
97 generally more biodiverse than secondary forests (Gibson et al., 2011). Indeed, despite their  
98 degradation, Borneo's logged forests retain potentially important communities of ground-  
99 dwelling mammals (Deere et al., 2017), bats (Struebig et al., 2013), birds (Edwards et al., 2010)  
100 and invertebrates (Slade, Mann, & Lewis, 2011). Much less is understood, however, about how  
101 such habitat degradation impacts the ecological interactions among co-occurring species, such  
102 as between predators and prey, hosts and parasites, and plants and their pollinators (Andresen,  
103 Arroyo-Rodríguez, & Escobar, 2018).

104

105 A powerful approach for understanding ecological interactions is through network analyses, in  
106 which interactions ('edges') are represented by links among biological 'nodes' (usually  
107 species) (Cirtwill et al., 2018). These networks most commonly depict mutualisms such as  
108 pollination and seed dispersal (Bascompte, 2009) or antagonisms such as parasitism and  
109 predation (Lafferty, Dobson, & Kuris, 2006), quantifying aspects of the community's trophic  
110 structure. Through measuring and comparing aspects of network structure, it is possible to  
111 predict a system's resilience to perturbations (Memmott, Waser, & Price, 2004), the importance  
112 of a species to a given network function (Freeman, 1978), and the potential for competition  
113 between species and their conspecifics (Bastolla et al., 2009). Altered network structure may  
114 thus reveal functionally important shifts within ecological communities.

115

116 Highly mobile predators may be important for stabilising numbers of prey throughout their  
117 habitat (McCann, Rasmussen, & Umbanhowar, 2005; McCracken et al., 2012), by dampening  
118 boom and bust cycles of insects (Kunz, Torrez, Bauer, Lobo, & Fleming, 2011). Previously,  
119 lower bird abundance linked to forest degradation was shown to reduce top-down control of  
120 phytophagous herbivores, thus increasing herbivory (Peter, Berens, Grieve, & Farwig, 2015)  
121 and potentially affecting forest restoration (Böhm, Wells, & Kalko, 2011). Similarly, bats may  
122 control herbivorous insects in rainforests (Kalka, Smith, & Kalko, 2008). Therefore, the loss  
123 of bats may be expected to alter ecosystem functioning via trophic cascades.

124

125 Research in palaeotropical forests suggests logging affects bat community composition and  
126 abundance by altering roost availability (Struebig et al., 2013), reflecting patterns seen in the  
127 neotropics (Peters, Malcolm, & Zimmerman, 2006). While these communities might be  
128 predicted to show altered network structures, studies from mutualistic neotropical systems of  
129 bats dispersing seeds have shown little difference in network structure in fragmented forest,

130 despite a reduction in the number of food species consumed (Laurindo, Novaes, Vizentin-  
131 Bugoni, & Gregorin, 2019), possibly as a result of highly resilient bat species which are core  
132 to their networks. Bat-seed dispersal networks have been shown to be robust to secondary  
133 extinctions (Mello et al., 2011), but parallels between mutualistic and antagonistic networks  
134 may be limited due to known differences in their structure (Lewinsohn, Prado, Jordano,  
135 Bascompte, & Olesen, 2006; Thébault & Fontaine, 2010). Therefore, given the key predation  
136 roles of insectivorous bats in rainforests, an improved understanding of their feeding ecology  
137 is a priority for the conservation of bats and their ecosystems (Meyer, Struebig, & Willig,  
138 2016).

139  
140 Genetic tools, particularly high throughput sequencing (HTS), are increasingly used for dietary  
141 analyses (Aizpurua et al., 2018; Clare, Fraser, Braid, Fenton, & Hebert, 2009; Czenze et al.,  
142 2018; Razgour et al., 2011). The application of DNA metabarcoding to bat and bird faeces  
143 makes it possible to obtain detailed information on previously unknown species interactions  
144 (Clare, 2014; Creer et al., 2016; Evans, Kitson, Lunt, Straw, & Pocock, 2016; Roslin &  
145 Majaneva, 2016). While traditional approaches based solely on the morphological  
146 identification of prey items in guano restricted the resolution of diet, metabarcoding approaches  
147 can allow numerous prey species to be identified at genus- or family-level (Clare, 2014), so  
148 providing the means to compare datasets of ecological interactions across networks.

149  
150 Here we use DNA metabarcoding to assess the impact of rainforest degradation on predator-  
151 prey interactions, focusing on insectivorous bats that forage under the forest canopy in Borneo.  
152 We captured bats in old growth and logged rainforest and generated bipartite ecological  
153 networks of their interactions with prey using metabarcoding of their guano. Comparing the  
154 taxonomic composition, completeness and structure of these networks, we predicted that:



155 1. Disturbance causes the network in logged forest to have lower functional  
156 complementarity, modularity and nestedness than networks in old growth forest.

157 2. Bats in logged forest consume fewer prey items than in old growth forest, leading to  
158 higher closeness centrality in logged forests.

159

160 In addition, we screened the resulting sequence data for economically important pests of

161 forestry plantations and agricultural crops in modified tropical landscapes.

162 **Methods**

163 **Sample collection**

164 We sampled bats using six harp traps per night at three sites in lowland tropical rainforest in  
165 Sabah, Malaysian Borneo, each <500m above sea level and experiencing a largely unseasonal  
166 climate. In total we sampled at 636 unique trapping locations over 876 trap nights. We collected  
167 faecal samples in two old growth sites: Danum Valley Conservation Area (hereafter ‘Danum’),  
168 Maliau Basin Conservation Area (‘Maliau’), and a forest heavily disturbed by multiple rounds  
169 of logging: the Stability of Altered Forest Ecosystems Project (‘SAFE’). Bats were captured  
170 by placing harp traps at regular intervals (mean 37m SD 77m) along landscape features such  
171 as streams and trails. The traps were erected in the morning, and then checked at approximately  
172 8PM and 8AM. Bats were released at the points of capture, with pregnant, lactating or juvenile  
173 bats being released instantly. Otherwise, captured bats were placed into individual cloth bags  
174 for up to 12 hours, upon which any guano was removed and stored at -20°C. For full  
175 information on fieldwork see Supplementary Information 1.

176

177 **Laboratory work**

178 To build a network of bat-insect interactions for each of the three forest sites studied (Danum,  
179 Maliau and SAFE), we sequenced prey DNA from bat guano using metabarcoding. DNA  
180 extraction, PCR, sequencing and quality-control took place following the methods outlined by  
181 Czenze et al. (2018). Briefly, we extracted DNA using a Qiagen stool kit, then amplified it  
182 using arthropod-specific primers (Zeale, Butlin, Barker, Lees, & Jones, 2011) and sequenced  
183 the DNA on an Illumina MiSeq (Supplementary Information 2).

**Table 1. Bat species and samples used to construct the ecological networks.**

|                                                          | Old growth forest |        | Logged forest |
|----------------------------------------------------------|-------------------|--------|---------------|
|                                                          | Danum             | Maliau | SAFE          |
| <i>Hipposideros cervinus</i> (Fawn Roundleaf bat)        | 184               | 90     | 110           |
| <i>Hipposideros diadema</i> (Diadem roundleaf bat)       | 2                 | 10     | 3             |
| <i>Hipposideros dyacorum</i> (Dayak roundleaf bat)       | 0                 | 13     | 9             |
| <i>Hipposideros ridleyi</i> (Ridley's roundleaf bat)     | 2                 | 1      | 14            |
| <i>Kerivoula hardwickii</i> (Hardwicke's woolly bat)     | 3                 | 0      | 23            |
| <i>Kerivoula intermedia</i> (Small woolly bat)           | 29                | 9      | 44            |
| <i>Kerivoula papillosa</i> (Papillose woolly bat)        | 21                | 0      | 6             |
| <i>Rhinolophus borneensis</i> (Bornean horseshoe bat)    | 1                 | 26     | 10            |
| <i>Rhinolophus sedulus</i> (Lesser woolly horseshoe bat) | 10                | 4      | 14            |
| <i>Rhinolophus trifoliatus</i> (Trefoil horseshoe bat)   | 14                | 19     | 28            |

184

185 **Bioinformatics**

186

187 The resulting sequences were merged into contiguous reads, the primers were removed, and  
 188 the reads were length-filtered and collapsed to haplotype with any singletons excluded from  
 189 the resulting dataset, before clustering sequences into Molecular Operational Taxonomic Units  
 190 (MOTUs) using the Uclust algorithm (Edgar, 2010) in QIIME (Caporaso, Kuczynski,  
 191 Stombaugh, Bittinger, & Bushman, 2010). To reduce costs, we restricted sequencing to the ten  
 192 bat species for which we were able to obtain at least ten guano samples from one or more forest  
 193 sites (see Table 1 for sample sizes). This approach was taken to ensure that, as much as is  
 194 possible, networks contained the same sets of bat taxa. Removing rare or unevenly distributed  
 195 species was suggested by Blüthgen (2010) to reduce the confounding impact of observation  
 196 frequency. We only took this approach for bats and not for MOTUs due to the expected  
 197 comparative rarity of most MOTUs consumed.

198

199 Where not otherwise stated, we generated the three networks by clustering sequences into  
 200 MOTUs at 0.95 similarity, chosen to balance over- and under-splitting of MOTUs. We then

201 compared representative sequences of each MOTU to one another using BLAST+ (Camacho  
202 et al., 2009), with the resulting data being filtered in LULU (Frøslev et al., 2017) to combine  
203 suspected duplicate MOTUs. However as the choice of clustering threshold used to cluster the  
204 sequence data into prey MOTUs can have a strong effect on the conclusions drawn (Clare et  
205 al., 2016; Hemprich-Bennett et al., 2018), we examine a range of clustering thresholds for a  
206 subset of the analyses in Prediction 1 to ensure that our conclusions are robust to our choice of  
207 this key parameter.

208

209 For a subset of analyses indicated below, networks were generated for each site at every MOTU  
210 clustering level from 0.91-0.98 similarity before quality control in LULU, allowing us to test  
211 the robustness of conclusions to changes in clustering level used.

212

### 213 **Analysis**

214 We imported binary adjacency matrices generated into R version 3.4.4 (R Core Team, 2017)  
215 for analysis. For network-level analyses these matrices were then summed by bat species (i.e.  
216  $a_{ij}$  denotes all instances of bat species  $i$  consuming MOTU  $j$ ), giving weighting to the network.

217

218 **Prediction 1: Disturbance causes the network in logged forest to have lower functional**  
219 **complementarity, modularity and nestedness than networks in old growth forest.**

220

221 To compare networks we focus on three measured components of network structure:  
222 nestedness, modularity and functional complementarity (Figure 1). Nestedness represents the  
223 extent to which the interactions of specialist nodes are nested subsets of the interactions of the  
224 generalist nodes (Almeida-Neto et al., 2008). Highly nested communities are more resilient to  
225 perturbations (Memmott et al., 2004), as the generalists and specialists perform the same role,

226 conferring redundancy. Decreases in the nestedness of plant-pollinator communities following  
227 disturbance leads to reduced functional redundancy (Soares, Ferreira, & Lopes, 2017). We here  
228 calculate two metrics used to measure nestedness: discrepancy (Brualdi & Sanderson, 1999),  
229 and weighted nestedness based on overlap and decreasing fill (WNODF) (Almeida-Neto,  
230 Guimarães, Guimarães, Loyola, & Ulrich, 2008). Modularity is the extent to which a network's  
231 interactions are partitioned into weakly-coupled 'modules' (Rezende, Albert, Fortuna, &  
232 Bascompte, 2009), which can contain the negative effects of perturbation (Fortuna et al., 2010).  
233 Modularity tends to decrease as prey availability is reduced (Oliveira, 2018), potentially  
234 increasing susceptibility to adverse effects of future stressors. Functional complementarity  
235 (Blüthgen & Klein, 2011; Devoto et al., 2012; Peralta, Frost, Rand, Didham, & Tylianakis,  
236 2014), calculates the extent to which species have complementary non-overlapping diets by  
237 measuring the branch lengths of a functional dendrogram of their dietary dissimilarity. These  
238 metrics describe some of the most important elements of network structure and respond reliably  
239 to alterations to MOTU clustering level (Hemprich-Bennett et al., 2018), while allowing us to  
240 assess how phenomena such as habitat alteration affect ecosystem functioning.

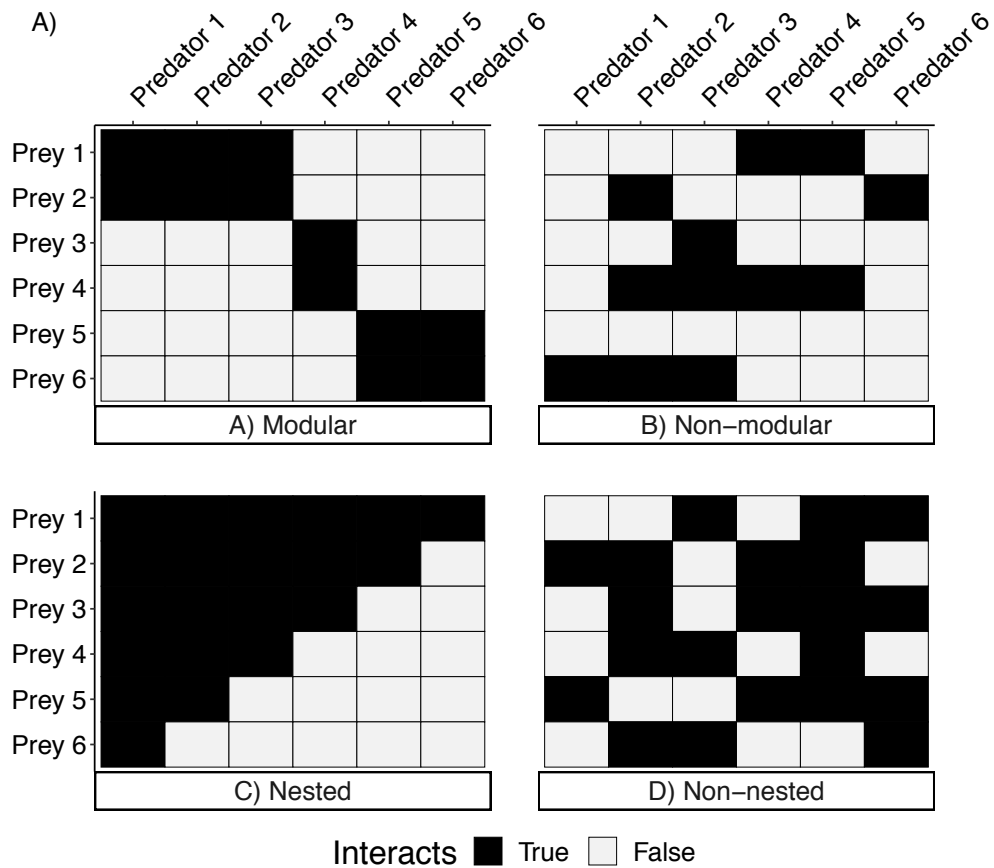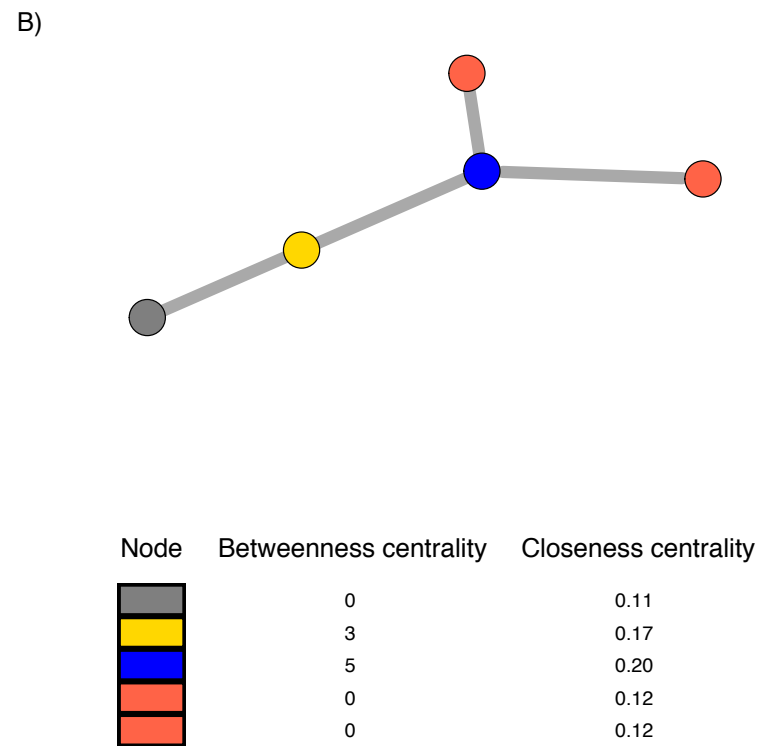

241

242 Figure 1). Panel 1 shows networks characterised by extreme a) modularity, b) non-modularity, c) nestedness structures and d) non-nestedness in

243 bipartite networks. Panel 2 shows a simple network with values of betweenness centrality and closeness centrality for each node to 2 decimal

244 places.

245 To test whether each of these metrics differ significantly between habitats more than would be  
246 expected by chance, we obtained null distributions for each metric, network and clustering  
247 threshold using the swap algorithm (Dormann & Strauss, 2014) to randomize each network for  
248 each MOTU clustering level 1,000 times, preserving the row and column sums. The observed  
249 value was deemed to be significantly different from chance if it was outside of the range of  
250 2.5-97.5% of the randomly generated values. Two networks were also deemed different from  
251 one another if their ‘expected’ ranges did not overlap. Choice of MOTU clustering threshold  
252 in ecological metabarcoding studies has been shown to alter measurements of most network  
253 metrics (Hemprich-Bennett et al., 2018), and so to assess the impact of node resolution on the  
254 networks analysed here, we performed this analysis on data generated at each MOTU clustering  
255 threshold between 91-98% using the package ‘LOTUS’ (Hemprich-Bennett et al., 2018), which  
256 acts as a wrapper for the bipartite package (Dormann, Gruber, & Fründ, 2008). A conclusion  
257 can be considered to be robust if it is consistently found across all MOTU clustering thresholds  
258 used.

259  
260 As sample size varied greatly across species and site (Table 1), we checked the impact of  
261 sample size and species diversity included in our analysed networks by using random  
262 subsamples of the bats captured at each site to generate smaller networks ranging from 40  
263 individuals to the full network dimension, with 1,000 iterations per increment. Each focal  
264 metric other than modularity was calculated for the subnetworks, and the Shannon diversity  
265 (Shannon, 1948) of nodes used to create the network was recorded. These values were plotted  
266 to observe if network size (number of individuals used to make the network) or bat diversity  
267 were important determinants of network structure. If the rank order of a measured metric was  
268 not shown to be strongly determined by network size or bat diversity, then any conclusions  
269 drawn from it can be considered robust to sampling effort.

270

271 To determine the contribution of a given bat species to the measured networks, we also  
272 generated subnetworks by removing each species individually from the original networks and  
273 calculating each network metric. The influence of the species was then calculated by  
274 subtracting the subnetwork's measured value from the whole-network value. We then ranked  
275 these calculated differences to show which species had the greatest and smallest impact on  
276 each network metric per site.

277

278 To obtain information on the taxonomic composition of bat diets, we compared a representative  
279 sequence for each MOTU using BLAST+ 2.7.1 (Camacho et al., 2009) against a database of  
280 arthropod CO1 sequences from the Barcode Of Life Database (BOLD) (Ratnasingham &  
281 Hebert, 2007), as accessed on 27/04/18. Using the program MEGAN 6.11.7 (Huson et al.,  
282 2016) and the quality-control parameters outlined in Salinas-Ramos et al., (2015), we excluded  
283 all sequences that could not be assigned to Order level, and used the BLAST assignments to  
284 determine the taxonomic composition of each guano sample. For each bat species at each site,  
285 we calculated the proportion of individuals that consumed a given Order of prey. We focussed  
286 on taxonomic Order (rather than, e.g. Family or Genus) due to the greater success in sequence  
287 assignment success at this level as sequence library completeness for Bornean arthropods is  
288 low.

289 **Prediction 2: Bats in logged forest consume fewer discrete prey items than in old growth**  
290 **forest, leading to higher closeness centrality in logged forests.**

291

292 We calculated the degree (number of prey MOTUs consumed) for each individual bat using  
293 the R package 'bipartite' (Dormann et al., 2008) and analysed these data with a fixed effects  
294 model, using species, habitat type (old growth or logged forest) and site as fixed effects, using



295 backwards model selection with the Akaike information criterion (AIC), to detect whether  
296 models using habitat type or site were stronger predictors of bat degree. For each bat species  
297 we also calculated two measures of centrality using bipartite. Measures of centrality identify  
298 the influence of a node within a system or the distribution of its influences, often based on path  
299 lengths between nodes (Delmas et al., 2019). We focus on closeness centrality and betweenness  
300 centrality (Figure 1). Closeness centrality uses the shortest path lengths between all pairs of  
301 nodes to measure the proximity of the nodes in the network to one another, providing a measure  
302 of how rapidly a perturbation can spread (Freeman, 1978). If habitat degradation reduces the  
303 diversity or richness of prey available to predators, network metrics such as closeness centrality  
304 (Martín González, Dalsgaard, & Olesen, 2010) may increase as the nodes become ‘closer’  
305 together. Betweenness centrality, in contrast, identifies the number of times a node is in the  
306 shortest path-length between any two other nodes, and so quantifies the importance of the node  
307 in connecting the overall network (Freeman, 1977). Using these measures of centrality,  
308 researchers have attempted to quantify the concept of ‘keystone species’ within the context of  
309 mutualistic networks (Martín González et al., 2010; Mello et al., 2015). In networks of  
310 frugivory, high centrality is linked both to the taxonomic class of a node, and the node having  
311 a high level of dietary specialisation (Mello et al., 2015), but in pollinators high centrality is  
312 associated with generalism (Martín González et al., 2010).

313

314 In addition, to assess the potential presence of prey species in bat diets, we compared our  
315 sequence data to publicly-available sequences on BOLD (Ratnasingham & Hebert, 2007) on  
316 01/06/18 using the R package ‘bold’ (Chamberlain, 2019). We assigned sequences to species  
317 level using the highest obtained ‘similarity’ score per sequence if it was >0.98. The output data  
318 were then compared to a list of Malaysian crop pest species names obtained from Vun Khen  
319 (1996).

320

321 All code used for analyses in this paper can be found at:

322 <https://github.com/hemprichbennett/bat-diet>; see Supplementary Information 2 for additional

323 detail on laboratory work and bioinformatic analyses.

## 324 **Results**

325 We captured 3,292 bats of 41 species, providing 700 faecal samples of 10 species that were  
326 used to create ecological networks (see Table 1). In total the 700 faecal samples yielded  
327 18,737,930 contiguous reads, which were used to assemble the paired-end files. After removing  
328 adapters and primers, and any sequence with incomplete adapter or primer, this was reduced  
329 to 10,064,815 sequences, which was further reduced to 932,459 unique haplotypes after  
330 collapsing to haplotype, removing singletons, and discarding sequences outside of 2bp of the  
331 expected read-length. At 95% clustering this was condensed to 14,623 MOTUs, which LULU  
332 then reduced to 3,811 MOTUs (see Supplementary Information 3).

333

334 **Prediction 1: Disturbance causes networks in logged forest to have lower functional**  
335 **complementarity, modularity and nestedness than in old growth forest.**

336

337 Null models (Figure 3) indicated that the logged site was consistently less nested than the old  
338 growth sites (using the metrics discrepancy and WNODF). In an old growth forest site  
339 (Danum), values for functional complementarity were almost always within the expected  
340 range. Modularity was only significantly different from expectation in the logged forest, but it  
341 was always more modular than the old growth sites. No metrics analysed showed alterations  
342 in their rank order between the different MOTU clustering thresholds used, and so any  
343 conclusions drawn are unaltered by this bioinformatic parameter. Low values of discrepancy  
344 and high values of WNODF indicate a nested structure, a low value of modularity indicates a  
345 lack of modular structure, and a low value of functional complementarity indicates no  
346 complementarity between the predators.

347

348 Functional complementarity in logged forest was intermediate between the old growth sites,  
349 and likely not impacted by habitat degradation. Contrary to previous suggestions (Fründ,  
350 McCann, & Williams, 2016) we did not find that nestedness performed poorly with small  
351 sample sizes.

352 Most network metrics were greatly altered by bat removal, with the common species *H.*  
353 *cervinus* and *K. intermedia* causing the largest alteration to most metrics (see Supplementary  
354 Information 6). *R. borneensis* was shown to be important for the discrepancy, functional  
355 complementarity and modularity of an old growth site (Maliau).

356

357 Rarefaction revealed little impact of the diversity or richness of bats included in a network on  
358 any observed metric, but strong effects of the number of samples used to generate a subnetwork  
359 (see Supplementary Information 7). Discrepancy, functional complementarity and WNODF  
360 showed distinctions between logged and old growth forest sites once sampling effort  
361 approached completion.

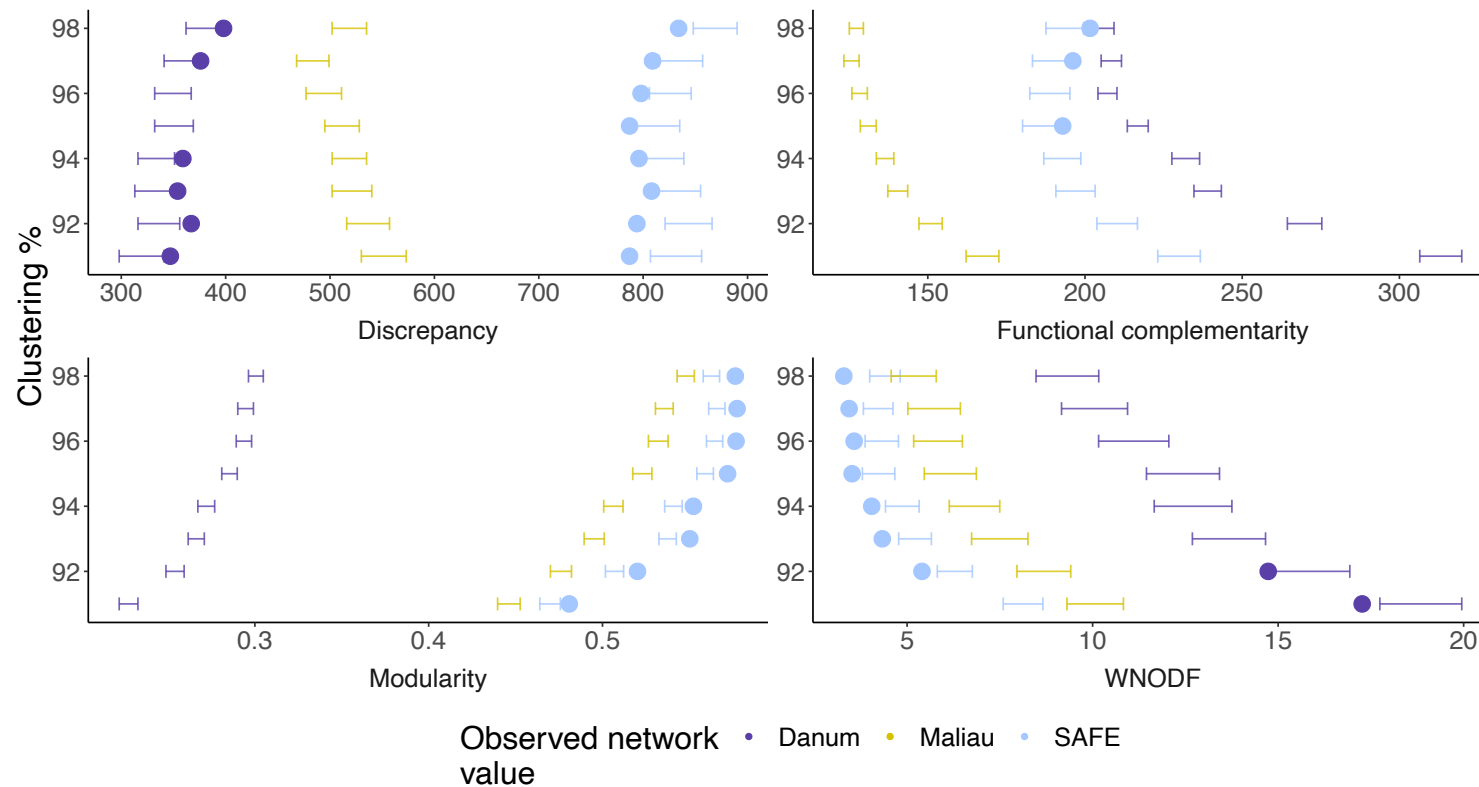

362

363 Figure 2. Summary plot showing the observed values (circles) and 95% confidence intervals (bars) given by the random values generated for each  
 364 metric studied at each MOTU clustering level, showing how conclusions drawn are altered by MOTU clustering level. The observed values for  
 365 each network were only plotted for the networks and metrics where the observed values fell outside of the range of 95% of the random values. For  
 366 most metrics studied, the 95% confidence intervals do not overlap at most clustering levels used, showing that the networks differ regardless of  
 367 clustering level used. Danum and Maliau are the old growth sites, and SAFE the logged site.

368 **Prediction 2: Bats in logged forest consume fewer discrete prey items than in old growth**  
369 **forest, leading to higher closeness centrality in logged forests.**

370 We found a significant difference in degree for bats in old growth versus logged forest (F:  
371 84.84 on 11 and 688 DF,  $p < 0.01$ , adjusted  $R^2 = 0.57$ ; see Table 2). The effect of habitat type  
372 on the number of MOTU consumed by an individual bat (its degree) was greater than the effect  
373 of species identity (Table 2, Figure 3), with bats in old growth forest consuming a greater  
374 number of MOTUs than bats in logged forest. The difference was lowest in *Hipposideros*  
375 species. This lower degree in logged forest shows that bats in this habitat generally consumed  
376 a lower number of prey items than their conspecifics in old growth rainforest.

377

378 All bat species had comparably low closeness centrality within the logged forest (see  
379 Supplementary Information 4), consistent with the observation that the logged forest had lower  
380 connectance than at the old growth forest sites. This shows that the bat species nodes were  
381 further from all other nodes in their network than in old growth rainforest. Rather than a  
382 reduced number of dietary items generating homogenous diets, this indicates the interactions  
383 of the network becoming more dispersed. At one of the old growth sites (Maliau) *Hipposideros*  
384 *cervinus* and *Rhinolophus borneensis* were the only species to have non-zero betweenness  
385 centrality scores (see Supplementary Information 5), indicating that every shortest path-length  
386 between nodes at Maliau (old growth) went via one of this pair of species, as opposed to the  
387 more diverse range of shortest path-lengths found in the other two networks.

388

**Table 2. Degree model coefficients from fixed effects model, testing for the effects of habitat type (logged or old growth) and species identity on the degree of the individual bats studied.**

| <b>Term</b>                    | <b>Estimate</b> | <b>Std error</b> | <b>Statistic</b> | <b>P value</b> |
|--------------------------------|-----------------|------------------|------------------|----------------|
| Habitat: Logged                | 9.078           | 0.874            | 10.384           | <0.001         |
| Habitat: Old growth            | 14.330          | 0.630            | 22.740           | <0.001         |
| <i>Hipposideros diadema</i>    | -2.680          | 2.948            | -0.909           | 0.364          |
| <i>Hipposideros dyacorum</i>   | -5.045          | 2.458            | -2.053           | 0.040          |
| <i>Hipposideros ridleyi</i>    | 2.407           | 2.820            | 0.854            | 0.394          |
| <i>Kerivoula hardwickii</i>    | -0.915          | 2.336            | -0.392           | 0.695          |
| <i>Kerivoula intermedia</i>    | 0.708           | 1.382            | 0.512            | 0.609          |
| <i>Kerivoula papillosa</i>     | -3.681          | 2.230            | -1.651           | 0.099          |
| <i>Rhinolophus borneensis</i>  | 4.198           | 1.928            | 2.178            | 0.030          |
| <i>Rhinolophus sedulus</i>     | 0.617           | 2.201            | 0.281            | 0.779          |
| <i>Rhinolophus trifoliatus</i> | 2.491           | 1.552            | 1.605            | 0.109          |

389

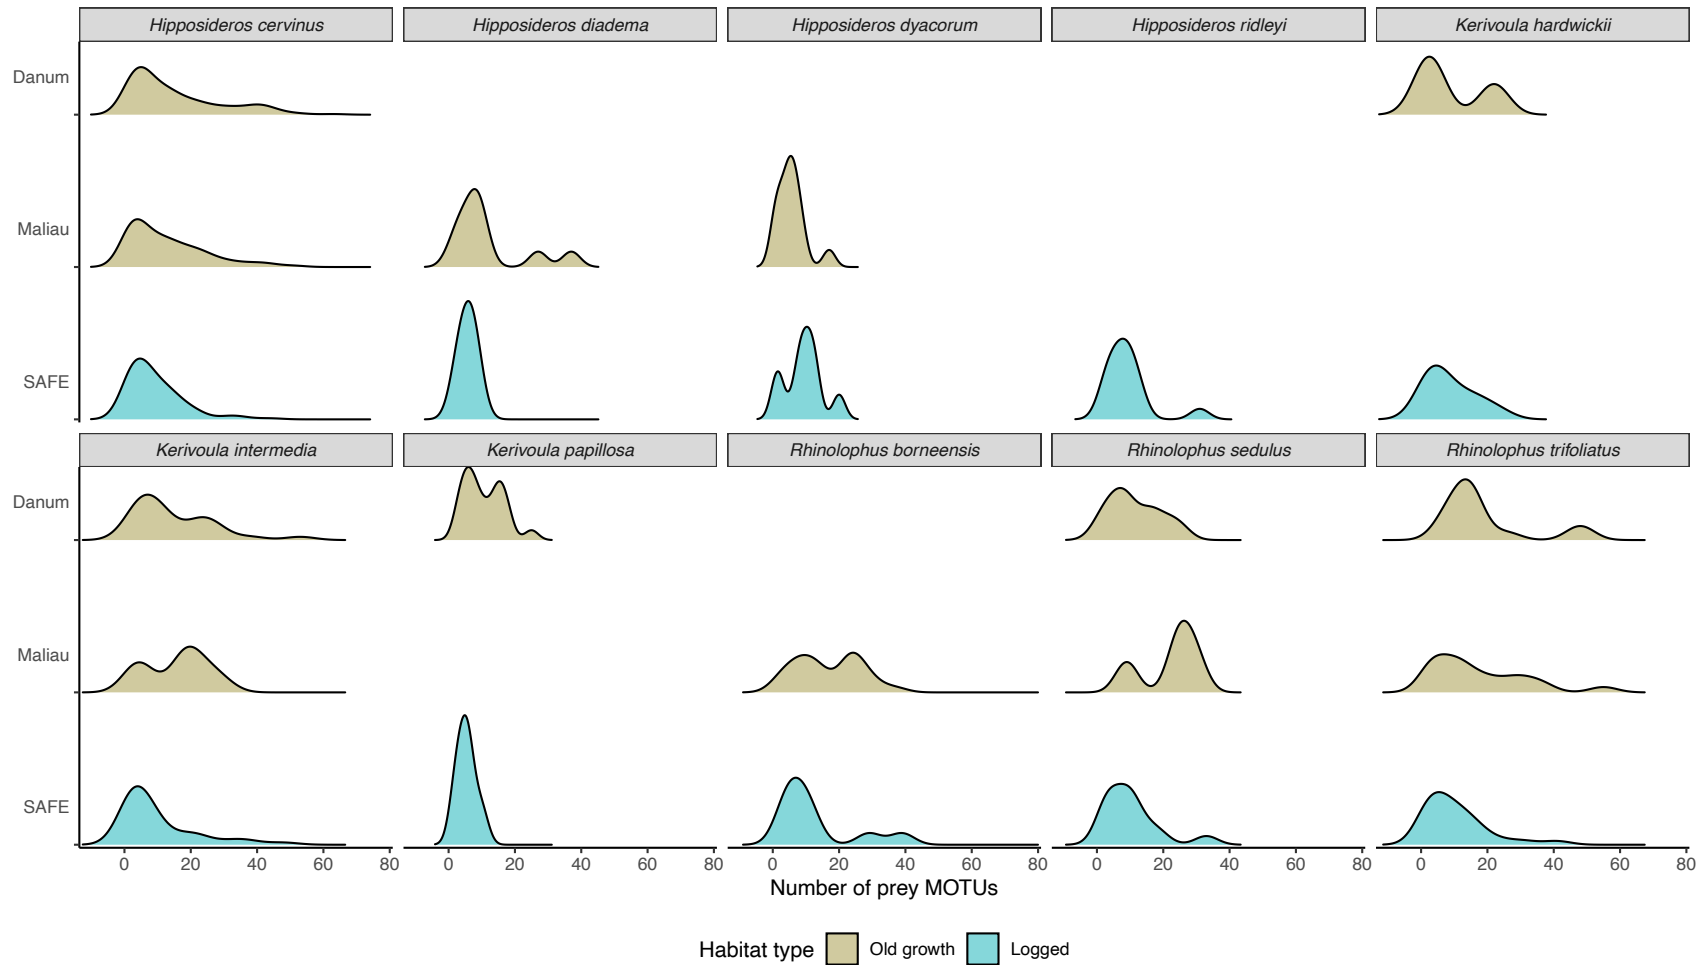

390

391 Figure 3. Smoothed histograms showing the number of MOTUs consumed by the individual bats for each focal bat species at each site. Species

392 on average consumed a greater number of MOTUs in old growth forest than in logged forest.



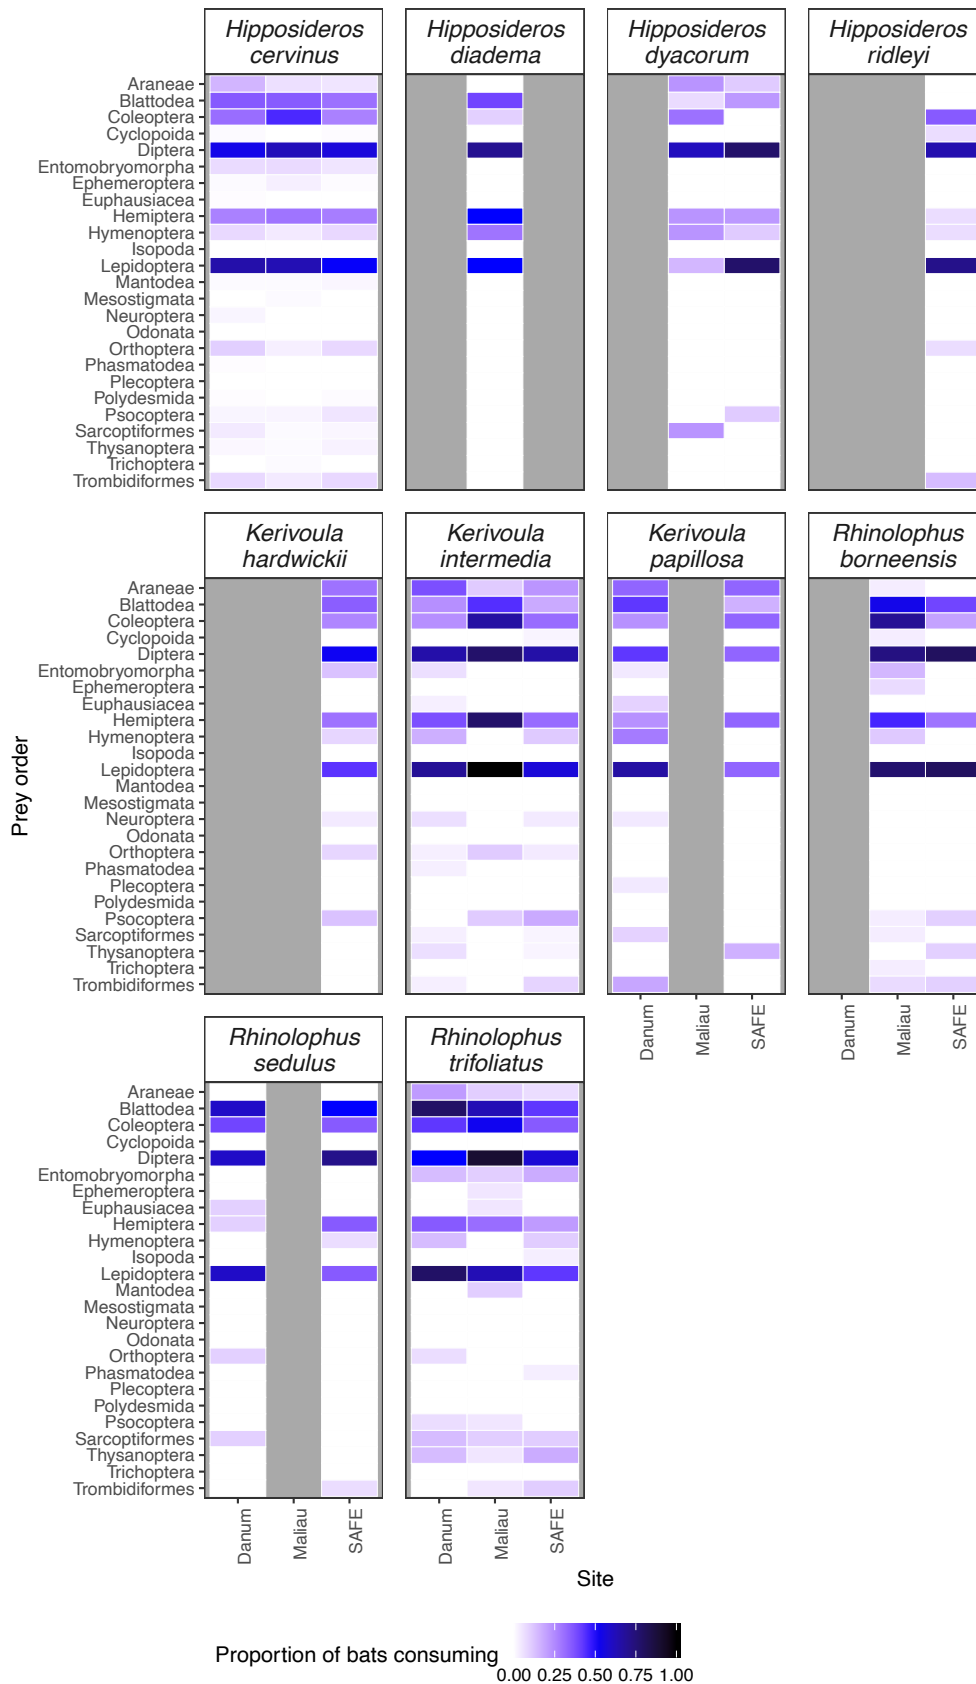

393

394 Figure 4. The proportion of individual bats of each species found to consume each taxonomic

395 Order at each site studied.

396 Lepidoptera, Diptera (especially Cecidomyiidae) and Blattodea (especially Ectobiidae) were  
 397 the most common prey Orders consumed (Figure 4; Supplementary Information 8). The  
 398 lepidopteran pest species *Pleuroptya balteata* was detected in the diet of several bat species  
 399 (Table 3) and at each site sampled, and *Psilogramma menephron* was consumed by *H. cervinus*  
 400 in the logged forest site. However relatively few individual bats were recorded as consuming  
 401 these species.  
 402

**Table 3. The crop pest species detected in the diet of bats at each of the study sites in Sabah.**

| Pest species        | Bat species           | Site   | Forest type | Number of detections / number of bats sampled at that site |
|---------------------|-----------------------|--------|-------------|------------------------------------------------------------|
| <i>P. balteata</i>  | <i>H. cervinus</i>    | Danum  | Old growth  | 3/184                                                      |
| <i>P. balteata</i>  | <i>H. diadema</i>     | Danum  | Old growth  | 1/2                                                        |
| <i>P. balteata</i>  | <i>R. trifoliatus</i> | Danum  | Old growth  | 1/14                                                       |
| <i>P. balteata</i>  | <i>H. cervinus</i>    | Maliau | Old growth  | 2/90                                                       |
| <i>P. balteata</i>  | <i>H. cervinus</i>    | Maliau | Old growth  | 1/90                                                       |
| <i>P. menephron</i> | <i>H. cervinus</i>    | SAFE   | Logged      | 1/110                                                      |
| <i>P. balteata</i>  | <i>H. cervinus</i>    | SAFE   | Logged      | 1/110                                                      |
| <i>P. balteata</i>  | <i>K. intermedia</i>  | SAFE   | Logged      | 1/44                                                       |
| <i>P. balteata</i>  | <i>R. sedulus</i>     | SAFE   | Logged      | 1/14                                                       |
| <i>P. balteata</i>  | <i>R. trifoliatus</i> | SAFE   | Logged      | 1/28                                                       |

## 403 **Discussion**

404 We found substantial differences in bat-insect interactions across sites experiencing varying  
405 degrees of habitat degradation. Bats consumed significantly fewer prey in logged forest sites  
406 than old growth forest; indeed, habitat type had a stronger effect on the number of MOTUs  
407 consumed by an individual bat than species identity.

408

409 Network structure also differed in several key aspects between the logged forest and old growth  
410 sites. Structural differences in centrality, modularity and nestedness together indicate that  
411 logged forest networks are more specialised than old growth rainforest networks. Systems that  
412 are specialised in this manner have been shown to be more vulnerable to extinctions than those  
413 with a more generalised structure (Memmott et al., 2004), such as the old growth rainforest  
414 networks analysed. Rainforests in Southeast Asia are facing multiple stressors, including the  
415 effects of disturbance, habitat fragmentation and climate change (Deere et al., 2020; Struebig  
416 et al., 2015). Our findings of altered network structure in an area which has been selectively  
417 logged indicate that such logged forests may be more sensitive to the effects of these future  
418 perturbations.

419

420 Bats foraging within the logged forest site consistently consumed fewer prey MOTUs than  
421 those within old growth forest. Indeed, the effect of habitat type was greater than that of the  
422 bat species in question, showing a strong alteration to foraging activity within logged forest.  
423 This was mirrored by the findings of reduced closeness centrality within the logged network,  
424 as the positions of bats within the network shifted. The most abundant bat species were found  
425 to have key roles in the structuring of their networks. Common predators will encounter a  
426 greater richness of prey than rarer species, through the ecological sampling effect (Dormann,  
427 Fründ, & Schaefer, 2017). While rare nodes are thought to have a stabilising effect on

428 ecological networks (McCann, 2000) and are of conservation interest, abundant species are  
429 likely key to ecosystem functioning (Baker et al., 2018) as they are involved in a high  
430 proportion of the trophic energy transfer within a system. A possible strategy for conservation  
431 of ecological function could therefore be to find the species most important to a system and  
432 target them (Montoya, Rogers, & Memmott, 2012). If using this framework, we find that the  
433 most common bat (*Hipposideros cervinus*) is likely the species most key to the network, while  
434 also being the species with the least reduction in the number of prey MOTUs it consumes in  
435 the logged forest site (Figure 3).

436

437 Two species of moths known as crop or forestry pests were found in bats diets: *Pleuroptya*  
438 *balteata* was consumed at all sites and *Psilogamma menephron* was consumed in the logged  
439 forest. This is consistent with the potential role of tropical bats in pest control: although they  
440 represented only a small percentage (0.4%) of the MOTUs consumed by the bats overall, they  
441 were foraging in forest habitat and so the prey are likely occurring at lower densities than they  
442 would be expected to in managed landscapes. Natural habitats are thought to be important  
443 sources of pests to agricultural landscapes (Tscharntke et al., 2007) and so their consumption  
444 by predators is potentially of some economic importance; in this case *P. menephron* is an  
445 important pest of timber trees and *P. balteata* feeds on leaves of mango, tea and rambai (Vun  
446 Khen, 1996). In the neotropics (Kalka & Kalko, 2006; Kalka et al., 2008; Morrison & Lindell,  
447 2012; Williams-Guillén, Perfecto, & Vandermeer, 2008) and temperate Europe (Böhm et al.,  
448 2011) bats are important agents controlling insect herbivory, but there are few examples from  
449 Southeast Asia (cf. Maas, Clough, & Tscharntke, 2013). We here provide one of few examples  
450 of bats in the region consuming pests, potentially reducing numbers of such species in natural  
451 habitats.

452

## 453 **Limitations**

454 Due to the highly labour-intensive nature of capturing forest-interior bats it was only possible  
455 to sample three ecological networks. With limited replication (only one logged forest site and  
456 two old growth sites sampled), it is not possible to attribute differences between the sites  
457 unambiguously to the effects of logging, rather than other site-specific differences.  
458 Nonetheless, this work documents marked differences in network structure across the  
459 landscape that are consistent with variations in forest management, and which is likely to have  
460 implications for community stability and dynamics. It also highlights the utility of  
461 metabarcoding-based approaches for more comprehensive investigation of between-habitat  
462 differences in tropical forest predator-prey networks.

463

## 464 **Conclusions**

465 Through combining DNA metabarcoding and network analysis, we have been able to measure  
466 how the ecological interactions which structure ecological communities differ between  
467 communities in logged and old growth forest. We show that in a logged forest bats and their  
468 prey exhibit altered network structures, which make them more prone to future local  
469 extinctions, adding to the previous findings that logged forest bat communities have altered  
470 composition and abundance (Struebig et al., 2013). Logged forests, although often heavily  
471 degraded, comprise a large proportion of the remaining rainforest extent and support  
472 considerable biodiversity, and so are highly important for conservation. However, our data also  
473 indicate that such forests are potentially more fragile than their old growth counterparts, and  
474 so efforts should be made to reduce future environmental perturbations where possible.

475 **Acknowledgements**

476 This study was funded by the UK Natural Environment Research Council to SJR, OL and MJS  
477 (under the Human-Modified Tropical Forests programme, NE/K016407/1; <http://lombok.nerc-hmtf.info/>), a Royal Society grant (RG130793) to ELC, and a Bat Conservation International  
478 grant to DRHB. We used Queen Mary's Apocrita HPC facility, supported by QMUL Research-  
479 IT (<http://doi.org/10.5281/zenodo.438045>).

481 For assistance with data collection we thank Jamiluddin Jami, Arnold James, Mohd. Mustamin,  
482 Ampat Siliwong, Sabidee Mohd. Rizan, Najmuddin Jamal, Genevieve Durocher and Anne  
483 Seltmann. We thank Henry Bernard, Eleanor Slade and members of the LOMBOK consortium  
484 for facilitating research in Sabah, and we are grateful to the Sabah Biodiversity Council (licence  
485 numbers in Supplementary Information 10)

486 We thank Steven Le Comber, Hernani Oliveira, Joshua Potter, Sandra Álvarez Carretero and  
487 Kim Warren for their analytical assistance, and Mark Brown, Darren Evans and Talya Hackett  
488 for their comments on an earlier version of this manuscript. We thank Richard Sebastian and  
489 Omar Khalilur Rahman for their assistance with translating the manuscript abstract, and Craig  
490 Palmer for graphical assistance.

## 491 **References**

- 492 Aizpurua, O., Budinski, I., Georgiakakis, P., Gopalakrishnan, S., Ibañez, C., Mata, V., ...  
493 Alberdi, A. (2018). Agriculture shapes the trophic niche of a bat preying on multiple  
494 pest arthropods across Europe: evidence from DNA metabarcoding. *Molecular*  
495 *Ecology*, 27(3), 815–825. doi: 10.1111/mec.14474
- 496 Almeida-Neto, M., Guimarães, P., Guimarães, P. R., Loyola, R. D., & Ulrich, W. (2008). A  
497 consistent metric for nestedness analysis in ecological systems: reconciling concept  
498 and measurement. *Oikos*, 117(8), 1227–1239. doi: 10.1111/j.0030-1299.2008.16644.x
- 499 Andresen, E., Arroyo-Rodriguez, V., & Escobar, F. (2018). Tropical biodiversity: the  
500 importance of biotic interactions for its origin, maintenance, function and  
501 conservation. In *Ecological networks in the tropics. An integrative overview of*  
502 *species interactions from some of the most species-rich habitats on earth*.  
503 Gewerbestrasse, Switzerland: Springer Nature.
- 504 Baker, D. J., Garnett, S. T., O'Connor, J., Ehmke, G., Clarke, R. H., Woinarski, J. C. Z., &  
505 McGeoch, M. A. (2018). The conservation of abundance in nonthreatened species.  
506 *Conservation Biology*. doi: 10.1111/cobi.13197
- 507 Barlow, J., Lennox, G. D., Ferreira, J., Berenguer, E., Lees, A. C., Nally, R. M., ... Gardner,  
508 T. A. (2016). Anthropogenic disturbance in tropical forests can double biodiversity  
509 loss from deforestation. *Nature*, 535(7610), 144–147. doi: 10.1038/nature18326
- 510 Bascompte, J. (2009). Mutualistic networks. *Frontiers in Ecology and the Environment*, 7(8),  
511 429–436. doi: 10.1890/080026
- 512 Bastolla, U., Fortuna, M. A., Pascual-García, A., Ferrera, A., Luque, B., & Bascompte, J.  
513 (2009). The architecture of mutualistic networks minimizes competition and increases  
514 biodiversity. *Nature*, 458(7241), 1018–1020. doi: 10.1038/nature07950

- 515 Beckett, S. J. (2016). Improved community detection in weighted bipartite networks. *Royal*  
516 *Society Open Science*, 3(1), 140536. doi: 10.1098/rsos.140536
- 517 Blüthgen, N. (2010). Why network analysis is often disconnected from community ecology:  
518 A critique and an ecologist's guide. *Basic and Applied Ecology*, 11(3), 185–195. doi:  
519 10.1016/j.baae.2010.01.001
- 520 Blüthgen, N., & Klein, A.-M. (2011). Functional complementarity and specialisation: The  
521 role of biodiversity in plant–pollinator interactions. *Basic and Applied Ecology*, 12(4),  
522 282–291. doi: 10.1016/j.baae.2010.11.001
- 523 Böhm, S. M., Wells, K., & Kalko, E. K. V. (2011). Top-Down Control of Herbivory by Birds  
524 and Bats in the Canopy of Temperate Broad-Leaved Oaks (*Quercus robur*). *PLoS*  
525 *ONE*, 6(4), e17857. doi: 10.1371/journal.pone.0017857
- 526 Brualdi, R. A., & Sanderson, J. G. (1999). Nested species subsets, gaps, and discrepancy.  
527 *Oecologia*, 119(2), 256–264. doi: 10.1007/s004420050784
- 528 Camacho, C., Coulouris, G., Avagyan, V., Ma, N., Papadopoulos, J., Bealer, K., & Madden,  
529 T. L. (2009). BLAST+: architecture and applications. *BMC Bioinformatics*, 10, 421.  
530 doi: 10.1186/1471-2105-10-421
- 531 Caporaso, J. G., Kuczynski, J., Stombaugh, J., Bittinger, K., & Bushman, F. D. (2010).  
532 QIIME allows analysis of high-throughput community sequencing data. *Nature*  
533 *Methods*, 7, 335–336. doi: doi:10.1038/nmeth.f.303
- 534 Chamberlain, S. (2019). *bold: Interface to bold systems API*. Retrieved from  
535 <https://CRAN.R-project.org/package=bold>
- 536 Cirtwill, A. R., Riva, G. V. D., Gaiarsa, M. P., Bimler, M. D., Cagua, E. F., Coux, C., &  
537 Dehling, D. M. (2018). A review of species role concepts in food webs. *Food Webs*,  
538 e00093. doi: 10.1016/j.fooweb.2018.e00093



- 539 Clare, E. L. (2014). Molecular detection of trophic interactions: emerging trends, distinct  
540 advantages, significant considerations and conservation applications. *Evolutionary*  
541 *Applications*, 7(9), 1144–1157. doi: 10.1111/eva.12225
- 542 Clare, E. L., Chain, F. J. J., Littlefair, J. E., & Cristescu, M. E. (2016). The effects of  
543 parameter choice on defining molecular operational taxonomic units and resulting  
544 ecological analyses of metabarcoding data. *Genome*, 59(11), 981–990. doi:  
545 10.1139/gen-2015-0184
- 546 Clare, E. L., Fraser, E. E., Braid, H. E., Fenton, M. B., & Hebert, P. D. N. (2009). Species on  
547 the menu of a generalist predator, the eastern red bat *Lasiurus borealis*: using a  
548 molecular approach to detect arthropod prey. *Molecular Ecology*, 18(11), 2532–2542.  
549 doi: 10.1111/j.1365-294X.2009.04184.x
- 550 Creer, S., Deiner, K., Frey, S., Porazinska, D., Taberlet, P., Thomas, W. K., ... Bik, H. M.  
551 (2016). The ecologist's field guide to sequence-based identification of biodiversity.  
552 *Methods in Ecology and Evolution*, 7(9), 1008–1018. doi: 10.1111/2041-210X.12574
- 553 Czenze, Z. J., Tucker, J. L., Clare, E. L., Littlefair, J. E., Hemprich-Bennett, D. R., Oliveira,  
554 H. F. M., ... Parsons, S. (2018). Spatiotemporal and demographic variation in the diet  
555 of New Zealand lesser short-tailed bats (*Mystacina tuberculata*). *Ecology and*  
556 *Evolution*, 8(15), 7599–7610. doi: 10.1002/ece3.4268
- 557 Deere, N. J., Guillera-Arroita, G., Baking, E. L., Bernard, H., Pfeifer, M., Reynolds, G., ...  
558 Struebig, M. J. (2017). High Carbon Stock forests provide co-benefits for tropical  
559 biodiversity. *Journal of Applied Ecology*, 55(2), 997–1008. doi: 10.1111/1365-  
560 2664.13023
- 561 Deere, N. J., Guillera-Arroita, G., Platts, P. J., Mitchell, S. L., Baking, E. L., Bernard, H., ...  
562 Struebig, M. J. (2020). Implications of zero-deforestation commitments: Forest

- 563 quality and hunting pressure limit mammal persistence in fragmented tropical  
564 landscapes. *Conservation Letters*, *n/a*(*n/a*), e12701. doi: 10.1111/conl.12701
- 565 Delmas, E., Besson, M., Brice, M.-H., Burkle, L. A., Riva, G. V. D., Fortin, M.-J., ... Poisot,  
566 T. (2019). Analysing ecological networks of species interactions. *Biological Reviews*,  
567 *94*(1), 16–36. doi: 10.1111/brv.12433
- 568 Devoto, M., Bailey, S., Craze, P., & Memmott, J. (2012). Understanding and planning  
569 ecological restoration of plant-pollinator networks: Understanding network  
570 restoration. *Ecology Letters*, *15*(4), 319–328. doi: 10.1111/j.1461-0248.2012.01740.x
- 571 Dormann, C. F., Fründ, J., & Schaefer, H. M. (2017). Identifying Causes of Patterns in  
572 Ecological Networks: Opportunities and Limitations. *Annual Review of Ecology,*  
573 *Evolution, and Systematics*, *48*(1), 559–584. doi: 10.1146/annurev-ecolsys-110316-  
574 022928
- 575 Dormann, C. F., Gruber, B., & Fründ, J. (2008). *Introducing the bipartite Package:*  
576 *Analysing Ecological Networks*. 8, 4.
- 577 Dormann, C. F., & Strauss, R. (2014). A method for detecting modules in quantitative  
578 bipartite networks. *Methods in Ecology and Evolution*, *5*(1), 90–98. doi:  
579 10.1111/2041-210X.12139
- 580 Edgar, R. C. (2010). Search and clustering orders of magnitude faster than BLAST.  
581 *Bioinformatics*, *26*(19), 2460–2461. doi: 10.1093/bioinformatics/btq461
- 582 Edwards, D. P., Larsen, T. H., Docherty, T. D. S., Ansell, F. A., Hsu, W. W., Derhe, M. A.,  
583 ... Wilcove, D. S. (2010). Degraded lands worth protecting: the biological importance  
584 of Southeast Asia's repeatedly logged forests. *Proceedings of the Royal Society B:*  
585 *Biological Sciences*, *278*(1702), 82–90. doi: 10.1098/rspb.2010.1062

- 586 Evans, D. M., Kitson, J. J. N., Lunt, D. H., Straw, N. A., & Pocock, M. J. O. (2016). Merging  
587 DNA metabarcoding and ecological network analysis to understand and build resilient  
588 terrestrial ecosystems. *Functional Ecology*, 30(12), 1904–1916. doi: 10.1111/1365-  
589 2435.12659
- 590 Fortuna, M. A., Stouffer, D. B., Olesen, J. M., Jordano, P., Mouillot, D., Krasnov, B. R., ...  
591 Bascompte, J. (2010). Nestedness versus modularity in ecological networks: two sides  
592 of the same coin? *Journal of Animal Ecology*, 79(4), 811–817. doi: 10.1111/j.1365-  
593 2656.2010.01688.x
- 594 Freeman, L. C. (1977). A Set of Measures of Centrality Based on Betweenness. *Sociometry*,  
595 40(1), 35–41. doi: 10.2307/3033543
- 596 Freeman, L. C. (1978). Centrality in social networks conceptual clarification. *Social*  
597 *Networks*, 1(3), 215–239.
- 598 Frøslev, T. G., Kjøller, R., Bruun, H. H., Ejrnæs, R., Brunbjerg, A. K., Pietroni, C., &  
599 Hansen, A. J. (2017). Algorithm for post-clustering curation of DNA amplicon data  
600 yields reliable biodiversity estimates. *Nature Communications*, 8(1), 1188. doi:  
601 10.1038/s41467-017-01312-x
- 602 Fründ, J., McCann, K. S., & Williams, N. M. (2016). Sampling bias is a challenge for  
603 quantifying specialization and network structure: lessons from a quantitative niche  
604 model. *Oikos*, 125(4), 502–513. doi: 10.1111/oik.02256
- 605 Gaveau, D. L. A., Sloan, S., Molidena, E., Yaen, H., Sheil, D., Abram, N. K., ... Meijaard, E.  
606 (2014). Four Decades of Forest Persistence, Clearance and Logging on Borneo. *PLOS*  
607 *ONE*, 9(7), e101654. doi: 10.1371/journal.pone.0101654

- 608 Ghazoul, J., Burivalova, Z., Garcia-Ulloa, J., & King, L. A. (2015). Conceptualizing Forest  
609 Degradation. *Trends in Ecology & Evolution*, 30(10), 622–632. doi:  
610 10.1016/j.tree.2015.08.001
- 611 Gibson, L., Lee, T. M., Koh, L. P., Brook, B. W., Gardner, T. A., Barlow, J., ... Sodhi, N. S.  
612 (2011). Primary forests are irreplaceable for sustaining tropical biodiversity. *Nature*,  
613 478(7369), 378–381. doi: 10.1038/nature10425
- 614 Hemprich-Bennett, D. R., Oliveira, H. F. M., Le Comber, S. C., Rossiter, S. J., & Clare, E. L.  
615 (2018). Assessing the impact of taxon resolution on network structure, with  
616 implication for comparative ecology. *BioRxiv*, 357376. doi: 10.1101/357376
- 617 Huson, D. H., Beier, S., Flade, I., Górska, A., El-Hadidi, M., Mitra, S., ... Tappu, R. (2016).  
618 MEGAN Community Edition - Interactive Exploration and Analysis of Large-Scale  
619 Microbiome Sequencing Data. *PLOS Computational Biology*, 12(6), e1004957. doi:  
620 10.1371/journal.pcbi.1004957
- 621 Kalka, M., & Kalko, E. K. V. (2006). Gleaning Bats as Underestimated Predators of  
622 Herbivorous Insects: Diet of *Micronycteris microtis* (Phyllostomidae) in Panama.  
623 *Journal of Tropical Ecology*, 22(1), 1–10. Retrieved from JSTOR.
- 624 Kalka, Smith, & Kalko. (2008). Bats Limit Arthropods and Herbivory in a Tropical Forest.  
625 *Science*, 320(5872), 71–71. doi: 10.1126/science.1153352
- 626 Kunz, T. H., Torrez, E. B. de, Bauer, D., Lobo, T., & Fleming, T. H. (2011). Ecosystem  
627 services provided by bats. *Annals of the New York Academy of Sciences*, 1223(1), 1–  
628 38. doi: 10.1111/j.1749-6632.2011.06004.x
- 629 Lafferty, K. D., Dobson, A. P., & Kuris, A. M. (2006). Parasites dominate food web links.  
630 *Proceedings of the National Academy of Sciences*, 103(30), 11211–11216. doi:  
631 10.1073/pnas.0604755103

- 632 Laurindo, R. S., Novaes, R. L. M., Vizontin-Bugoni, J., & Gregorin, R. (2019). The effects of  
633 habitat loss on bat-fruit networks. *Biodiversity and Conservation*, 28(3), 589–601.  
634 doi: 10.1007/s10531-018-1676-x
- 635 Lewinsohn, T. M., Prado, P. I., Jordano, P., Bascompte, J., & Olesen, J. M. (2006). Structure  
636 in plant–animal interaction assemblages. *Oikos*, 113(1), 174–184. doi:  
637 10.1111/j.0030-1299.2006.14583.x
- 638 Maas, B., Clough, Y., & Tschardt, T. (2013). Bats and birds increase crop yield in tropical  
639 agroforestry landscapes. *Ecology Letters*, 16(12), 1480–1487. doi: 10.1111/ele.12194
- 640 Martín González, A. M., Dalsgaard, B., & Olesen, J. M. (2010). Centrality measures and the  
641 importance of generalist species in pollination networks. *Ecological Complexity*, 7(1),  
642 36–43. doi: 10.1016/j.ecocom.2009.03.008
- 643 McCann, K. S. (2000). The diversity–stability debate. *Nature*, 405, 228–233.
- 644 McCann, K. S., Rasmussen, J. B., & Ulanowicz, R. E. (2005). The dynamics of spatially  
645 coupled food webs. *Ecology Letters*, 8(5), 513–523. doi: 10.1111/j.1461-  
646 0248.2005.00742.x
- 647 McCracken, G. F., Westbrook, J. K., Brown, V. A., Eldridge, M., Federico, P., & Kunz, T. H.  
648 (2012). Bats Track and Exploit Changes in Insect Pest Populations. *PLoS ONE*, 7(8),  
649 e43839. doi: 10.1371/journal.pone.0043839
- 650 Meijaard, E., Garcia-Ulloa, J., Sheil, D., Wich, S. A., Carlson, K. M., Juffe-Bignoli, D., &  
651 Brooks, T. M. (2018). *Oil palm and biodiversity*. Retrieved from  
652 <https://portals.iucn.org/library/node/47753>
- 653 Meijaard, E., & Sheil, D. (2007). A logged forest in Borneo is better than none at all. *Nature*,  
654 446. doi: 10.1038/446974a

- 655 Mello, M. A. R., Marquitti, F. M. D., Jr, P. R. G., Kalko, E. K. V., Jordano, P., & Aguiar, M.  
656 A. M. de. (2011). The Missing Part of Seed Dispersal Networks: Structure and  
657 Robustness of Bat-Fruit Interactions. *PLOS ONE*, 6(2), e17395. doi:  
658 10.1371/journal.pone.0017395
- 659 Mello, M. A. R., Rodrigues, F. A., Costa, L. da F., Kissling, W. D., Şekercioglu, Ç. H.,  
660 Marquitti, F. M. D., & Kalko, E. K. V. (2015). Keystone species in seed dispersal  
661 networks are mainly determined by dietary specialization. *Oikos*, 124(8), 1031–1039.  
662 doi: 10.1111/oik.01613
- 663 Melo, F. P. L., Arroyo-Rodríguez, V., Fahrig, L., Martínez-Ramos, M., & Tabarelli, M.  
664 (2013). On the hope for biodiversity-friendly tropical landscapes. *Trends in Ecology*  
665 *& Evolution*, 28(8), 462–468. doi: 10.1016/j.tree.2013.01.001
- 666 Memmott, J., Waser, N. M., & Price, M. V. (2004). Tolerance of pollination networks to  
667 species extinctions. *Proceedings of the Royal Society of London. Series B: Biological*  
668 *Sciences*, 271(1557), 2605–2611. doi: 10.1098/rspb.2004.2909
- 669 Meyer, C. F. J., Struebig, M. J., & Willig, M. R. (2016). Chapter 4: Responses of Tropical  
670 Bats to Habitat Fragmentation, Logging, and Deforestation. In *Bats in the*  
671 *Anthropocene: Conservation of Bats in a Changing World* (pp. 63–105). Springer  
672 Open.
- 673 Montoya, D., Rogers, L., & Memmott, J. (2012). Emerging perspectives in the restoration of  
674 biodiversity-based ecosystem services. *Trends in Ecology & Evolution*, 27(12), 666–  
675 672. doi: 10.1016/j.tree.2012.07.004
- 676 Morrison, E. B., & Lindell, C. A. (2012). Birds and bats reduce insect biomass and leaf  
677 damage in tropical forest restoration sites. *Ecological Applications*, 22(5), 1526–1534.  
678 doi: 10.1890/11-1118.1

- 679 Oliveira, H. F. M. (2018). *El Niño effects on the structure of mutualistic and antagonistic bat*  
680 *food webs revealed by DNA barcoding* (PhD thesis). Queen Mary University of  
681 London, London, UK.
- 682 Peralta, G., Frost, C. M., Rand, T. A., Didham, R. K., & Tylianakis, J. M. (2014).  
683 Complementarity and redundancy of interactions enhance attack rates and spatial  
684 stability in host–parasitoid food webs. *Ecology*, *95*(7), 1888–1896. doi: 10.1890/13-  
685 1569.1
- 686 Peter, F., Berens, D. G., Grieve, G. R., & Farwig, N. (2015). Forest Fragmentation Drives the  
687 Loss of Insectivorous Birds and an Associated Increase in Herbivory. *Biotropica*,  
688 *47*(5), 626–635. doi: 10.1111/btp.12239
- 689 Peters, S. L., Malcolm, J. R., & Zimmerman, B. L. (2006). Effects of Selective Logging on  
690 Bat Communities in the Southeastern Amazon. *Conservation Biology*, *20*(5), 1410–  
691 1421. doi: 10.1111/j.1523-1739.2006.00526.x
- 692 R Core Team. (2017). *R: A Language and Environment for Statistical Computing*. Retrieved  
693 from <https://www.R-project.org/>
- 694 Ratnasingham, S., & Hebert, P. D. (2007). BOLD: The Barcode of Life Data System  
695 (<http://www.barcodinglife.org>). *Molecular Ecology Resources*, *7*(3), 355–364. doi:  
696 10.1111/j.1471-8286.2007.01678.x
- 697 Razgour, O., Clare, E. L., Zeale, M. R. K., Hanmer, J., Schnell, I. B., Rasmussen, M., ...  
698 Jones, G. (2011). High-throughput sequencing offers insight into mechanisms of  
699 resource partitioning in cryptic bat species. *Ecology and Evolution*, *1*(4), 556–570.  
700 doi: 10.1002/ece3.49

- 701 Rezende, E. L., Albert, E. M., Fortuna, M. A., & Bascompte, J. (2009). Compartments in a  
702 marine food web associated with phylogeny, body mass, and habitat structure.  
703 *Ecology Letters*, *12*(8), 779–788. doi: 10.1111/j.1461-0248.2009.01327.x
- 704 Roslin, T., & Majaneva, S. (2016). The use of DNA barcodes in food web construction—  
705 terrestrial and aquatic ecologists unite! *Genome*, *59*(9), 603–628. doi: 10.1139/gen-  
706 2015-0229
- 707 Salinas-Ramos, V. B., Herrera Montalvo, L. G., León-Regagnon, V., Arrizabalaga-Escudero,  
708 A., & Clare, E. L. (2015). Dietary overlap and seasonality in three species of  
709 mormoopid bats from a tropical dry forest. *Molecular Ecology*, *24*(20), 5296–5307.  
710 doi: 10.1111/mec.13386
- 711 Shannon, C. E. (1948). A Mathematical Theory of Communication. *Bell System Technical*  
712 *Journal*, *27*(3), 379–423. doi: 10.1002/j.1538-7305.1948.tb01338.x
- 713 Slade, E. M., Mann, D. J., & Lewis, O. T. (2011). Biodiversity and ecosystem function of  
714 tropical forest dung beetles under contrasting logging regimes. *Biological*  
715 *Conservation*, *144*(1), 166–174. doi: 10.1016/j.biocon.2010.08.011
- 716 Soares, R. G. S., Ferreira, P. A., & Lopes, L. E. (2017). Can plant-pollinator network metrics  
717 indicate environmental quality? *Ecological Indicators*, *78*, 361–370. doi:  
718 10.1016/j.ecolind.2017.03.037
- 719 Song, X.-P., Hansen, M. C., Stehman, S. V., Potapov, P. V., Tyukavina, A., Vermote, E. F.,  
720 & Townshend, J. R. (2018). Global land change from 1982 to 2016. *Nature*,  
721 *560*(7720), 639. doi: 10.1038/s41586-018-0411-9
- 722 Struebig, M. J., Turner, A., Giles, E., Lasmana, F., Tollington, S., Bernard, H., & Bell, D.  
723 (2013). Quantifying the Biodiversity Value of Repeatedly Logged Rainforests:



- 724 Gradient and Comparative Approaches from Borneo. *Advances in Ecological*  
725 *Research*, 48, 183–224. doi: 10.1016/B978-0-12-417199-2.00003-3
- 726 Struebig, M. J., Wilting, A., Gaveau, D. L. A., Meijaard, E., Smith, R. J., Abdullah, T., ...  
727 Kramer-Schadt, S. (2015). Targeted Conservation to Safeguard a Biodiversity  
728 Hotspot from Climate and Land-Cover Change. *Current Biology*, 25(3), 372–378.  
729 doi: 10.1016/j.cub.2014.11.067
- 730 Thébault, E., & Fontaine, C. (2010). Stability of Ecological Communities and the  
731 Architecture of Mutualistic and Trophic Networks. *Science*, 329(5993), 853–856. doi:  
732 10.1126/science.1188321
- 733 Tschamtker, T., Bommarco, R., Clough, Y., Crist, T. O., Kleijn, D., Rand, T. A., ... Vidal, S.  
734 (2007). Conservation biological control and enemy diversity on a landscape scale.  
735 *Biological Control*, 43(3), 294–309. doi: 10.1016/j.biocontrol.2007.08.006
- 736 Vun Khen, C. (1996). *Forest pest insects in Sabah*. Sandakan, Malaysia: Sabah Forest  
737 Department.
- 738 Williams-Guillén, K., Perfecto, I., & Vandermeer, J. (2008). Bats Limit Insects in a  
739 Neotropical Agroforestry System. *Science*, 320(5872), 70–70. doi:  
740 10.1126/science.1152944
- 741 Zeale, M. R. K., Butlin, R. K., Barker, G. L. A., Lees, D. C., & Jones, G. (2011). Taxon-  
742 specific PCR for DNA barcoding arthropod prey in bat faeces. *Molecular Ecology*  
743 *Resources*, 11(2), 236–244. doi: 10.1111/j.1755-0998.2010.02920.x
- 744
